# Supplementary material for: Laser-induced ultrafast spin-transfer processes in non-linear zigzag carbon chain systems
Source: Royal Society of Chemistry journal article supplement (doi:10.1039/d3cp02483k), 2023-01-01
Supplement: d3cp02483k1.pdf [file d3cp02483k1.pdf]

## Supplementary information of Laser-induced ultrafast spin-transfer processes in non-linear zigzag carbon chain systems

Mohamed Barhoumi,<sup>1,\*</sup> Jing Liu,<sup>2,†</sup> Georgios Lefkidis,<sup>1,‡</sup> and Wolfgang Hübner<sup>1,§</sup>

<sup>1</sup>*Department of Physics, Rheinland-Pfälzische Technische Universität Kaiserslautern (RPTU) Kaiserslautern-Landau, P.O. Box 3049, 67653 Kaiserslautern, Germany*

<sup>2</sup>*Institute of Theoretical Chemistry, Ulm University, 89081 Ulm, Germany*

(Dated: August 1, 2023)

### I. THEORY AND METHODS

#### A. CCSD and EOM-CCSD methods

We employ the coupled-cluster (CC) method to compute the many-body wave function of the ground state:

$$|\Psi\rangle = e^{\hat{T}}|\Phi_0\rangle. \quad (1)$$

The ground state wave function obtained from the Hartree-Fock method is  $|\Phi_0\rangle$  (reference state of the CC calculations). The cluster operator is represented by  $\hat{T}$ .

$$\hat{T} = \hat{T}_1 + \hat{T}_2 + \hat{T}_3 + \dots \hat{T}_N. \quad (2)$$

$\hat{T}_1, \hat{T}_2, \hat{T}_3$ , etc, collectively designate single, double, and triple excitation operators, respectively. Those operators can be written in second quantization, e.g.,  $\hat{T}_1$  and  $\hat{T}_2$  are

$$\hat{T}_1 = \sum_a \sum_r t_a^r \hat{a}_r^+ \hat{a}_a. \quad (3)$$

$$\hat{T}_2 = \frac{1}{4} \sum_{a,b} \sum_{r,s} t_{ab}^{rs} \hat{a}_r^+ \hat{a}_s^+ \hat{a}_b \hat{a}_a. \quad (4)$$

$t_a^r$  and  $t_{ab}^{rs}$  are the expansion coefficients of the corresponding operators and are called amplitudes. The subscripts a, b, and the superscripts r, and s denote the index of occupied and unoccupied orbitals, respectively.  $\hat{a}^+$  and  $\hat{a}$  are creation and annihilation operators, respectively.

The correlated excited states of a system can be computed employing the equation of motion coupled-cluster method (EOM-CCSD). We can create several multi-configurational wave functions using this technique as well as a single reference formalism. The CCSD (reference) state serves as the foundation for the EOM-CCSD excited states. The general formalism for the excited state wave function is

$$|\Psi_e\rangle = \hat{R}|CC\rangle = \hat{R}e^{\hat{T}}|\Phi_0\rangle. \quad (5)$$

A linear excitation operator is described by  $\hat{R}$  and referred to as an EOM-CCSD operator. For the case of EOM-CCSD, both  $\hat{T}$  and  $\hat{R}$  are truncated at single and double excitations.

#### B. SOC Hamiltonian and Time-Dependent Perturbation Theory

As we mentioned in the main text, SOC and a static external magnetic field are required in our study. SOC and magnetic field are perturbatively added

$$\begin{aligned} \hat{H}^{\text{SOC+B}} &= \sum_{i=1}^n \frac{Z_a^{\text{eff}}}{2c^2 R_i^3} \hat{\mathbf{L}} \cdot \hat{\mathbf{S}} + \sum_{i=1}^n \mu_L \hat{\mathbf{L}} \cdot \mathbf{B}_{\text{stat}} \\ &+ \sum_{i=1}^n \mu_S \hat{\mathbf{S}} \cdot \mathbf{B}_{\text{stat}}. \end{aligned} \quad (6)$$

\* mbarhou@rptu.de

† jing-1.liu@uni-ulm.de

‡ lefkidis@rptu.de

§ huebner@rptu.de

$\hat{\mathbf{S}}$  and  $\hat{\mathbf{L}}$  are the spin and the orbital angular momentum operators, respectively. The position vector of the  $i$ -th electron, relativistic effective nuclear charges of the  $a$ -th atom, and speed of light are represented by  $R_i^3$ ,  $Z_a^{\text{eff}}$ , and  $c$  respectively.  $\mu_{\mathbf{L}}$  and  $\mu_{\mathbf{S}}$  describe the gyromagnetic ratios. The time-dependent interaction between the laser pulse and the many-body wave functions is represented by

$$\hat{H}'(t) = \hat{\mathbf{D}} \cdot \mathbf{E}_{\text{laser}}(t). \quad (7)$$

The electric dipole-transition operator and the time-dependent electric field of the laser pulse are represented by  $\hat{\mathbf{D}}$  and  $\mathbf{E}_{\text{laser}}(\mathbf{t})$ , respectively. The propagation of the many-body wave function is performed within the interaction picture:

$$\frac{\partial c_n(t)}{\partial t} = \frac{-i}{\hbar} \sum_k \langle \Phi_n | \hat{H}'(t) | \Phi_k \rangle c_k(t) e^{-\frac{i}{\hbar}(E_k - E_n)t}. \quad (8)$$

The initial and final states are symbolized by  $n$  and  $k$ .  $\Phi$ , obtained from CCSD and EOM-CCSD calculations and modified with the influence of SOC and B, is the wave function of the many-body states.  $E$  and  $c$  describe the population and energy of the many-body states, respectively. The aforementioned differential equations in Eqs. (8) are quantitatively determined using the Cash-Karp adaptive-step-size control and an embedded fifth-order Runge-Kutta technique. We employ our algorithm program to optimize the parameters of the laser pulse and efficiently reach the desired spin process.

We move beyond one laser pulse by applying double laser pulses to induce spin-down (or spin-up) spin transfer processes in the non-linear zigzag carbon chain structures to which two Ni magnetic centers are attached. The equation (8) becomes:

$$\frac{\partial c_n(t)}{\partial t} = \frac{-i}{\hbar} \sum_k \langle \Phi_n | \hat{H}_{\text{int1}}(t) + \hat{H}_{\text{int2}}(t + \delta t) | \Phi_k \rangle c_k(t) \times \exp(-i(E_k - E_n)t/\hbar), \quad (9)$$

The interaction Hamiltonians of the initial and target laser pulses are  $\hat{H}_{\text{int1}}(t)$  and  $\hat{H}_{\text{int2}}(t)$ , respectively. The time delay between two laser pulses is represented by  $\delta t$ .

### C. Concept of $\Lambda$ process

The fundamental purpose of the  $\Lambda$  process is to transfer the electronic population from the initial state  $|n\rangle$  to the final state  $|m\rangle$  via intermediate state  $|l\rangle$  (see Fig. 1). We consider that the spin-dynamics  $\Lambda$  process is successfully induced under a laser pulse if its fidelity is higher than 70%. A spin-transfer process can occur if the spin densities of states  $|n\rangle$  and  $|m\rangle$  are localized on various magnetic centers. The process is known as a spin-flip process if the spin density is localized on the same atom with the initial and goal states having opposite spin orientations. The  $|l\rangle$  intermediate states must be spin-mixed for the spin-flip process.



FIG. 1. Our main idea is to establish a laser-induced population shift from one state to another via an intermediate state. An excitation from the starting state to an electronically higher-lying intermediate state is followed by a deexcitation from the intermediate state to the final state in such a transition scenario. This process is called the  $\Lambda$  process. It is possible to accomplish a spin-transfer process if the spin densities of states  $|n\rangle$  and  $|m\rangle$  are localized on various magnetic centers. A spin-flip scenario can be accomplished if the spin densities of  $|n\rangle$  and  $|m\rangle$  are localized on the same atom but have different spin orientations ( $\alpha \uparrow$  and  $\beta \downarrow$ ). A Zeeman splitting is induced under the application of the magnetic field. Spin-mixing is required for the  $|l\rangle$  intermediate states of a spin-flip process.

## II. SPIN DENSITY DISTRIBUTION AND SPIN DYNAMICS PROCESSES ON $\text{Ni}_2@C_{32}H_{32}$ AND $\text{Ni}_2@C_{36}H_{36}$

In Table I, we show the spin density distribution, energies, and expectation values of the spin angular momentum elements for the spin-flip and spin-transfer scenarios on non-linear zigzag carbon chain structure  $\text{Ni}_2@C_{32}H_{32}$  for the appropriate many-body states before and after inclusion spin-orbit-coupling and the magnetic field.

TABLE I: Spin density, energies, and expectation values of the spin angular momentum elements for the spin-flip and spin-transfer scenarios on non-linear zigzag carbon chain structure  $\text{Ni}_2@C_{32}H_{32}$  for the appropriate many-body states before and after inclusion spin-orbit-coupling and the magnetic field. The sign of  $\langle S_x \rangle$ ,  $\langle S_y \rangle$ , and  $\langle S_z \rangle$  signifies the spin direction: the positive and negative values are spin-up  $\alpha \uparrow$  and spin-down  $\beta \downarrow$ , respectively.

| Method   | States | Spin density before SOC and B |        |          |                       |                       |                       | Energy, spins directions and spin density after SOC and B |        |
|----------|--------|-------------------------------|--------|----------|-----------------------|-----------------------|-----------------------|-----------------------------------------------------------|--------|
|          |        | Ni1                           | Ni2    | $E$ (eV) | $\langle S_x \rangle$ | $\langle S_y \rangle$ | $\langle S_z \rangle$ | Ni1                                                       | Ni2    |
| EOM-CCSD | 77⟩    | 0.000                         | 0.000  | 3.509730 | 0.000                 | 0.000                 | 0.000                 | 0.000                                                     | 0.000  |
|          | 76⟩    | 0.006                         | 1.050  | 3.371310 | 0.000                 | 0.000                 | 1.000                 | 0.992                                                     | 0.062  |
|          | 75⟩    | 0.000                         | 0.000  | 3.371260 | 0.000                 | 0.000                 | 0.000                 | 0.000                                                     | 0.000  |
|          | 74⟩    | -0.006                        | -1.050 | 3.371200 | 0.000                 | 0.000                 | -1.000                | -0.992                                                    | -0.062 |
|          | 73⟩    | 0.000                         | 0.000  | 3.239990 | 0.000                 | 0.000                 | 1.000                 | 0.069                                                     | 0.569  |
|          | 72⟩    | 0.000                         | 0.000  | 3.239930 | 0.000                 | 0.000                 | 0.000                 | 0.000                                                     | 0.000  |
|          | 71⟩    | 1.016                         | 0.002  | 3.239880 | 0.000                 | 0.000                 | -1.000                | -0.069                                                    | -0.569 |
|          | 70⟩    | 0.000                         | 0.000  | 3.170420 | 0.000                 | 0.000                 | 1.000                 | -0.013                                                    | 1.009  |
|          | 69⟩    | -1.016                        | -0.002 | 3.170370 | 0.000                 | 0.000                 | 0.000                 | 0.000                                                     | 0.000  |
|          | 68⟩    | 0.011                         | 1.021  | 3.170320 | 0.000                 | 0.000                 | -1.000                | 0.013                                                     | -1.009 |
|          | 67⟩    | 0.000                         | 0.000  | 3.037860 | 0.000                 | 0.000                 | 2.000                 | 1.054                                                     | 1.084  |
|          | 66⟩    | -0.011                        | -1.021 | 3.037810 | 0.000                 | 0.000                 | 1.000                 | 0.527                                                     | 0.542  |
|          | 65⟩    | 0.000                         | 0.000  | 3.037750 | 0.000                 | 0.000                 | 0.000                 | 0.000                                                     | 0.000  |
|          | 64⟩    | 1.066                         | 0.045  | 3.037700 | 0.000                 | 0.000                 | -1.000                | -0.527                                                    | -0.542 |
|          | 63⟩    | 0.000                         | 0.000  | 3.037640 | 0.000                 | 0.000                 | -2.000                | -1.054                                                    | -1.084 |
|          | 62⟩    | -1.066                        | -0.045 | 3.024640 | 0.000                 | 0.000                 | 1.000                 | 0.580                                                     | 0.592  |
|          | 61⟩    | 0.000                         | 0.000  | 3.024580 | 0.000                 | 0.000                 | 0.000                 | 0.000                                                     | 0.000  |
|          | 60⟩    | 0.026                         | 0.992  | 3.024530 | 0.000                 | 0.000                 | -1.000                | -0.580                                                    | -0.592 |
|          | 59⟩    | 0.000                         | 0.000  | 3.019140 | 0.000                 | 0.000                 | 0.000                 | 0.000                                                     | 0.000  |
|          | 58⟩    | -0.026                        | -0.992 | 2.899320 | 0.000                 | 0.000                 | 1.000                 | 0.312                                                     | 0.074  |
|          | 57⟩    | 0.000                         | 0.000  | 2.899270 | 0.000                 | 0.000                 | 0.000                 | 0.000                                                     | 0.000  |
|          | 56⟩    | 1.067                         | 0.013  | 2.899220 | 0.000                 | 0.000                 | -1.000                | -0.312                                                    | -0.074 |

---

|     |        |        |          |       |       |        |        |        |
|-----|--------|--------|----------|-------|-------|--------|--------|--------|
| 55) | 0.000  | 0.000  | 2.568280 | 0.000 | 0.000 | 0.000  | 0.000  | 0.000  |
| 54) | -1.067 | -0.013 | 2.517180 | 0.000 | 0.000 | 0.992  | 0.455  | 0.010  |
| 53) | 0.000  | 0.000  | 2.517130 | 0.000 | 0.000 | 0.000  | 0.000  | 0.000  |
| 52) | 1.074  | 0.002  | 2.517070 | 0.000 | 0.000 | -0.992 | -0.455 | -0.010 |
| 51) | 0.000  | 0.000  | 2.442500 | 0.000 | 0.000 | 0.831  | 0.844  | 0.002  |
| 50) | -1.074 | -0.002 | 2.442400 | 0.000 | 0.000 | 0.000  | 0.000  | 0.000  |
| 49) | 0.000  | 0.000  | 2.442370 | 0.000 | 0.000 | -0.831 | -0.844 | -0.002 |
| 48) | 0.001  | 1.030  | 2.434180 | 0.000 | 0.000 | 0.993  | 0.006  | 1.042  |
| 47) | 0.000  | 0.000  | 2.434110 | 0.000 | 0.000 | 0.000  | 0.000  | 0.000  |
| 46) | -0.001 | -1.030 | 2.434070 | 0.000 | 0.000 | -0.992 | -0.006 | -1.042 |
| 45) | 0.069  | 0.569  | 2.423920 | 0.000 | 0.000 | 0.000  | 0.000  | 0.000  |
| 44) | 0.000  | 0.000  | 2.396940 | 0.000 | 0.000 | 0.000  | 0.000  | 0.000  |
| 43) | -0.069 | -0.569 | 2.396520 | 0.000 | 0.000 | 0.999  | 0.011  | 1.020  |
| 42) | 0.000  | 0.000  | 2.396470 | 0.000 | 0.000 | 0.000  | 0.000  | 0.000  |
| 41) | 0.992  | 0.062  | 2.396420 | 0.000 | 0.000 | -1.000 | -0.011 | -1.020 |
| 40) | 0.000  | 0.000  | 2.338180 | 0.000 | 0.000 | 0.000  | 0.000  | 0.000  |
| 39) | -0.992 | -0.062 | 2.278280 | 0.000 | 0.000 | 1.000  | 1.066  | 0.045  |
| 38) | 0.312  | 0.074  | 2.278220 | 0.000 | 0.000 | 0.000  | 0.000  | 0.000  |
| 37) | 0.000  | 0.000  | 2.278170 | 0.000 | 0.000 | -1.000 | -1.066 | -0.045 |
| 36) | -0.312 | -0.074 | 2.021190 | 0.000 | 0.000 | 1.000  | 0.071  | 0.021  |
| 35) | -0.013 | 1.009  | 2.021140 | 0.000 | 0.000 | 0.000  | 0.000  | 0.000  |
| 34) | 0.000  | 0.000  | 2.021090 | 0.000 | 0.000 | -1.000 | -0.071 | -0.021 |
| 33) | 0.013  | -1.009 | 1.665760 | 0.000 | 0.000 | 0.000  | 0.000  | 0.000  |
| 32) | 1.054  | 1.084  | 1.650800 | 0.000 | 0.000 | 0.000  | 0.000  | 0.000  |
| 31) | 0.527  | 0.542  | 1.648310 | 0.000 | 0.000 | 0.989  | 0.027  | 0.981  |
| 30) | 0.000  | 0.000  | 1.648260 | 0.000 | 0.000 | 0.000  | 0.000  | 0.000  |
| 29) | -0.527 | -0.542 | 1.648200 | 0.000 | 0.000 | -0.989 | -0.027 | -0.982 |
| 28) | -1.054 | -1.084 | 1.638380 | 0.000 | 0.000 | 0.999  | 1.012  | 0.041  |
| 27) | 0.580  | 0.592  | 1.638330 | 0.000 | 0.000 | 0.000  | 0.000  | 0.000  |
| 26) | 0.000  | 0.000  | 1.638280 | 0.000 | 0.000 | -0.999 | -1.012 | -0.041 |
| 25) | -0.580 | -0.592 | 1.576410 | 0.000 | 0.000 | 0.000  | 0.000  | 0.000  |
| 24) | 0.000  | 0.000  | 1.537190 | 0.000 | 0.000 | 0.996  | 1.063  | 0.013  |

---

|     |        |        |          |       |       |        |        |        |
|-----|--------|--------|----------|-------|-------|--------|--------|--------|
| 23⟩ | 0.459  | 0.010  | 1.537130 | 0.000 | 0.000 | 0.000  | 0.000  | 0.000  |
| 22⟩ | 0.000  | 0.000  | 1.537080 | 0.000 | 0.000 | -0.996 | -1.063 | -0.013 |
| 21⟩ | -0.459 | -0.010 | 1.534630 | 0.000 | 0.000 | 0.000  | -0.001 | 0.000  |
| 20⟩ | 0.071  | 0.021  | 1.310590 | 0.000 | 0.000 | 1.000  | -0.196 | 0.998  |
| 19⟩ | 0.000  | 0.000  | 1.310540 | 0.000 | 0.000 | 0.000  | 0.000  | 0.000  |
| 18⟩ | -0.071 | -0.021 | 1.310480 | 0.000 | 0.000 | -1.000 | 0.195  | -0.998 |
| 17⟩ | 0.000  | 0.000  | 1.299560 | 0.000 | 0.000 | 2.000  | 1.057  | 1.043  |
| 16⟩ | 1.013  | 0.041  | 1.299510 | 0.000 | 0.000 | 1.000  | 0.528  | 0.522  |
| 15⟩ | 0.000  | 0.000  | 1.299450 | 0.000 | 0.000 | 0.000  | 0.000  | 0.000  |
| 14⟩ | -1.013 | -0.041 | 1.299400 | 0.000 | 0.000 | -1.000 | -0.528 | -0.522 |
| 13⟩ | -0.195 | 0.998  | 1.299340 | 0.000 | 0.000 | -2.000 | -1.057 | -1.043 |
| 12⟩ | 0.000  | 0.000  | 1.295390 | 0.000 | 0.000 | 1.000  | 0.676  | 0.657  |
| 11⟩ | 0.195  | -0.998 | 1.295340 | 0.000 | 0.000 | 0.000  | 0.000  | 0.000  |
| 10⟩ | 1.057  | 1.043  | 1.295280 | 0.000 | 0.000 | -1.000 | -0.675 | -0.657 |
| 9⟩  | 0.528  | 0.522  | 1.293980 | 0.000 | 0.000 | 0.000  | 0.000  | 0.000  |
| 8⟩  | 0.000  | 0.000  | 0.162670 | 0.000 | 0.000 | 0.000  | 0.000  | 0.000  |
| 7⟩  | -0.528 | -0.522 | 0.149710 | 0.000 | 0.000 | 1.000  | 1.074  | 0.002  |
| 6⟩  | -1.057 | -1.043 | 0.149660 | 0.000 | 0.000 | 0.000  | 0.000  | 0.000  |
| 5⟩  | 0.675  | 0.657  | 0.149600 | 0.000 | 0.000 | -1.000 | -1.074 | -0.002 |
| 4⟩  | 0.000  | 0.000  | 0.104640 | 0.000 | 0.000 | 0.000  | 0.000  | 0.000  |
| 3⟩  | -0.675 | -0.657 | 0.000110 | 0.000 | 0.000 | 1.000  | 0.001  | 1.030  |
| 2⟩  | 0.000  | 0.000  | 0.000050 | 0.000 | 0.000 | 0.000  | 0.000  | 0.000  |
| 1⟩  | -0.002 | 0.000  | 0.000000 | 0.000 | 0.000 | -1.000 | -0.001 | -1.030 |

---

Also, Table II shows the spin density, energies, and expectation values of the spin angular momentum elements for the spin-flip and spin-transfer scenarios on non-linear zigzag carbon chain structure  $\text{Ni}_2@C_{36}H_{36}$  for the appropriate many-body states before and after inclusion spin-orbit-coupling and the magnetic field.

TABLE II: Spin density, energies, and expectation values of the spin angular momentum elements for the spin-flip and spin-transfer scenarios on non-linear zigzag carbon chain structure  $\text{Ni}_2@C_{36}H_{36}$  for the appropriate many-body states before and after inclusion spin-orbit-coupling and the magnetic field. The sign of  $\langle S_x \rangle$ ,  $\langle S_y \rangle$ , and  $\langle S_z \rangle$  signifies the spin direction: the positive and negative values are spin-up  $\alpha \uparrow$  and spin-down  $\beta \downarrow$ , respectively.

| Method   | States | Spin density before SOC and B Energy, spins directions and spin density after SOC and B |        |          |                       |                       |                       |        |        |
|----------|--------|-----------------------------------------------------------------------------------------|--------|----------|-----------------------|-----------------------|-----------------------|--------|--------|
|          |        | Ni1                                                                                     | Ni2    | $E$ (eV) | $\langle S_x \rangle$ | $\langle S_y \rangle$ | $\langle S_z \rangle$ | Ni1    | Ni2    |
| EOM-CCSD | 71⟩    | 0.000                                                                                   | 0.000  | 3.253340 | 0.000                 | 0.000                 | 0.000                 | 0.000  | 0.000  |
|          | 70⟩    | 0.000                                                                                   | 0.000  | 3.243930 | 0.000                 | 0.000                 | 1.000                 | 0.993  | 0.060  |
|          | 69⟩    | -0.660                                                                                  | -0.668 | 3.243870 | 0.000                 | 0.000                 | 0.000                 | 0.000  | 0.000  |
|          | 68⟩    | 0.000                                                                                   | 0.000  | 3.243820 | 0.000                 | 0.000                 | -1.000                | -0.993 | -0.060 |
|          | 67⟩    | 0.660                                                                                   | 0.668  | 3.121150 | 0.000                 | 0.000                 | 1.000                 | -0.029 | 0.999  |
|          | 66⟩    | -1.045                                                                                  | -1.058 | 3.121100 | 0.000                 | 0.000                 | 0.000                 | 0.000  | 0.000  |
|          | 65⟩    | -0.522                                                                                  | -0.529 | 3.121040 | 0.000                 | 0.000                 | -1.000                | 0.029  | -0.999 |
|          | 64⟩    | 0.000                                                                                   | 0.000  | 3.105210 | 0.000                 | 0.000                 | 2.000                 | 1.045  | 1.047  |
|          | 63⟩    | 0.522                                                                                   | 0.529  | 3.105150 | 0.000                 | 0.000                 | 1.000                 | 0.523  | 0.524  |
|          | 62⟩    | 1.045                                                                                   | 1.058  | 3.105100 | 0.000                 | 0.000                 | 0.000                 | 0.000  | 0.000  |
|          | 61⟩    | -0.951                                                                                  | 0.120  | 3.105040 | 0.000                 | 0.000                 | -1.000                | -0.523 | -0.524 |
|          | 60⟩    | 0.000                                                                                   | 0.000  | 3.104990 | 0.000                 | 0.000                 | -2.000                | -1.045 | -1.047 |
|          | 59⟩    | 0.951                                                                                   | -0.120 | 3.103170 | 0.000                 | 0.000                 | 1.000                 | 0.579  | 0.590  |
|          | 58⟩    | -0.022                                                                                  | -0.969 | 3.103120 | 0.000                 | 0.000                 | 0.000                 | 0.000  | 0.000  |
|          | 57⟩    | 0.000                                                                                   | 0.000  | 3.103060 | 0.000                 | 0.000                 | -1.000                | -0.579 | -0.590 |
|          | 56⟩    | 0.022                                                                                   | 0.969  | 3.102310 | 0.000                 | 0.000                 | 0.000                 | 0.000  | 0.000  |
|          | 55⟩    | 0.000                                                                                   | 0.000  | 2.720890 | 0.000                 | 0.000                 | 1.000                 | 0.446  | 0.189  |
|          | 54⟩    | -0.023                                                                                  | -0.118 | 2.720830 | 0.000                 | 0.000                 | 0.000                 | 0.000  | 0.000  |
|          | 53⟩    | 0.000                                                                                   | 0.000  | 2.720780 | 0.000                 | 0.000                 | -1.000                | -0.446 | -0.189 |
|          | 52⟩    | 0.023                                                                                   | 0.118  | 2.435800 | 0.000                 | 0.000                 | 1.000                 | 1.065  | 0.001  |
|          | 51⟩    | -0.446                                                                                  | -0.189 | 2.435750 | 0.000                 | 0.000                 | 0.000                 | 0.000  | 0.000  |
|          | 50⟩    | 0.000                                                                                   | 0.000  | 2.435690 | 0.000                 | 0.000                 | -1.000                | -1.065 | -0.001 |
|          | 49⟩    | 0.446                                                                                   | 0.189  | 2.427530 | 0.000                 | 0.000                 | 0.000                 | 0.000  | 0.000  |
|          | 48⟩    | -1.045                                                                                  | -1.047 | 2.373440 | 0.000                 | 0.000                 | 0.998                 | 0.000  | 1.002  |
|          | 47⟩    | -0.523                                                                                  | -0.524 | 2.373380 | 0.000                 | 0.000                 | 0.000                 | 0.000  | 0.000  |

---

|     |        |        |          |       |       |        |        |        |
|-----|--------|--------|----------|-------|-------|--------|--------|--------|
| 46) | 0.000  | 0.000  | 2.373330 | 0.000 | 0.000 | -0.998 | 0.000  | -1.002 |
| 45) | 0.523  | 0.524  | 2.357990 | 0.000 | 0.000 | 0.000  | 0.000  | 0.000  |
| 44) | 1.045  | 1.047  | 2.129480 | 0.000 | 0.000 | 0.000  | 0.000  | 0.000  |
| 43) | -0.579 | -0.590 | 2.089280 | 0.000 | 0.000 | 1.000  | 0.004  | 1.052  |
| 42) | 0.000  | 0.000  | 2.089220 | 0.000 | 0.000 | 0.000  | 0.000  | 0.000  |
| 41) | 0.579  | 0.590  | 2.089170 | 0.000 | 0.000 | -1.000 | -0.004 | -1.052 |
| 40) | 0.000  | 0.000  | 2.064380 | 0.000 | 0.000 | 1.000  | 0.023  | 0.118  |
| 39) | 0.029  | -0.998 | 2.064320 | 0.000 | 0.000 | 0.000  | 0.000  | 0.000  |
| 38) | 0.000  | 0.000  | 2.064270 | 0.000 | 0.000 | -1.000 | -0.023 | -0.118 |
| 37) | -0.029 | 0.998  | 2.002910 | 0.000 | 0.000 | 0.000  | 0.000  | 0.000  |
| 36) | 0.000  | 0.000  | 1.988790 | 0.000 | 0.000 | 1.000  | 1.045  | 0.002  |
| 35) | -0.993 | -0.060 | 1.988730 | 0.000 | 0.000 | 0.000  | 0.000  | 0.000  |
| 34) | 0.000  | 0.000  | 1.988680 | 0.000 | 0.000 | -1.000 | -1.045 | -0.002 |
| 33) | 0.993  | 0.060  | 1.570390 | 0.000 | 0.000 | 0.000  | 0.000  | 0.000  |
| 32) | -1.019 | 0.000  | 1.530030 | 0.000 | 0.000 | 0.978  | 0.002  | 1.048  |
| 31) | 0.000  | 0.000  | 1.529960 | 0.000 | 0.000 | 0.000  | 0.000  | 0.000  |
| 30) | 1.019  | 0.000  | 1.529920 | 0.000 | 0.000 | -0.978 | -0.002 | -1.048 |
| 29) | 0.000  | 0.000  | 1.503830 | 0.000 | 0.000 | 0.000  | 0.000  | 0.000  |
| 28) | 0.000  | 0.000  | 1.427060 | 0.000 | 0.000 | 0.000  | 0.000  | 0.000  |
| 27) | 0.000  | -1.072 | 1.423610 | 0.000 | 0.000 | 1.000  | 1.034  | 0.006  |
| 26) | 0.000  | 0.000  | 1.423560 | 0.000 | 0.000 | 0.000  | 0.000  | 0.000  |
| 25) | 0.000  | 1.072  | 1.423500 | 0.000 | 0.000 | -1.000 | -1.034 | -0.006 |
| 24) | -1.033 | -0.006 | 1.335560 | 0.000 | 0.000 | 0.000  | 0.000  | 0.000  |
| 23) | 0.000  | 0.000  | 1.323440 | 0.000 | 0.000 | 1.000  | 0.025  | 0.966  |
| 22) | 1.033  | 0.006  | 1.323370 | 0.000 | 0.000 | 0.000  | 0.000  | 0.000  |
| 21) | 0.000  | 0.000  | 1.323330 | 0.000 | 0.000 | -1.000 | -0.024 | -0.966 |
| 20) | -0.002 | -1.071 | 1.319520 | 0.000 | 0.000 | 1.000  | 0.949  | -0.117 |
| 19) | 0.000  | 0.000  | 1.319480 | 0.000 | 0.000 | 0.000  | 0.000  | 0.000  |
| 18) | 0.002  | 1.071  | 1.319410 | 0.000 | 0.000 | -1.000 | -0.949 | 0.117  |
| 17) | 0.000  | 0.000  | 1.308150 | 0.000 | 0.000 | 2.000  | 1.045  | 1.058  |
| 16) | -1.044 | -0.002 | 1.308090 | 0.000 | 0.000 | 1.000  | 0.523  | 0.529  |
| 15) | 0.000  | 0.000  | 1.308030 | 0.000 | 0.000 | 0.000  | 0.000  | 0.000  |

---

|     |        |        |          |       |       |        |        |        |
|-----|--------|--------|----------|-------|-------|--------|--------|--------|
| 14⟩ | 1.044  | 0.002  | 1.307980 | 0.000 | 0.000 | -1.000 | -0.523 | -0.529 |
| 13⟩ | 0.000  | 0.000  | 1.307930 | 0.000 | 0.000 | -2.000 | -1.045 | -1.058 |
| 12⟩ | -0.004 | -1.052 | 1.306080 | 0.000 | 0.000 | 1.000  | 0.659  | 0.669  |
| 11⟩ | 0.000  | 0.000  | 1.306020 | 0.000 | 0.000 | 0.000  | 0.000  | 0.000  |
| 10⟩ | 0.004  | 1.052  | 1.305970 | 0.000 | 0.000 | -1.000 | -0.659 | -0.669 |
| 9⟩  | 0.000  | 0.000  | 1.305280 | 0.000 | 0.000 | 0.000  | 0.000  | 0.000  |
| 8⟩  | -1.065 | -0.001 | 0.089390 | 0.000 | 0.000 | 1.000  | 0.000  | 1.072  |
| 7⟩  | 0.000  | 0.000  | 0.089340 | 0.000 | 0.000 | 0.000  | 0.000  | 0.000  |
| 6⟩  | 1.065  | 0.001  | 0.089280 | 0.000 | 0.000 | -1.000 | 0.000  | -1.072 |
| 5⟩  | 0.000  | 0.000  | 0.045350 | 0.000 | 0.000 | 0.000  | 0.000  | 0.000  |
| 4⟩  | 0.000  | -1.004 | 0.032570 | 0.000 | 0.000 | 1.000  | 1.019  | 0.000  |
| 3⟩  | 0.000  | 0.000  | 0.032520 | 0.000 | 0.000 | 0.000  | 0.000  | 0.000  |
| 2⟩  | 0.000  | 1.004  | 0.032470 | 0.000 | 0.000 | -1.000 | -1.019 | 0.000  |
| 1⟩  | 0.000  | 0.000  | 0.000000 | 0.000 | 0.000 | 0.000  | 0.000  | 0.000  |

---

Since the spin density distribution fulfills the requirements to accomplish the spin dynamics processes on  $\text{Ni}_2@\text{C}_{32}\text{H}_{32}$  and  $\text{Ni}_2@\text{C}_{36}\text{H}_{36}$ . Therefore, several spin-transfer scenarios are achieved. We present some of them in Fig. 2 ( $\text{Ni}_2@\text{C}_{32}\text{H}_{32}$ ) and in Fig. 3 ( $\text{Ni}_2@\text{C}_{36}\text{H}_{36}$ ). Besides, the optimized parameters of the laser pulses are shown in Table III.

Moreover, the reserved spin-transfer processes with the same laser pulses on  $\text{Ni}_2@\text{C}_{32}\text{H}_{32}$  and  $\text{Ni}_2@\text{C}_{36}\text{H}_{36}$  are accomplished and shown in Figs. 4-5, respectively. Their optimized parameters of the laser pulses are given in Table IV.



FIG. 2. Spin-transfer processes on  $\text{Ni}_2@C_{32}H_{32}$ :  $\text{Ni}_2 \rightarrow \text{Ni}_1$  ( $|3\rangle \rightarrow |7\rangle$ ),  $\text{Ni}_1 \rightarrow \text{Ni}_2$  ( $|7\rangle \rightarrow |31\rangle$ ),  $\text{Ni}_1 \rightarrow \text{Ni}_2$  ( $|37\rangle \rightarrow |46\rangle$ ),  $\text{Ni}_1 \rightarrow \text{Ni}_2$  ( $|39\rangle \rightarrow |43\rangle$ ),  $\text{Ni}_1 \rightarrow \text{Ni}_2$  ( $|39\rangle \rightarrow |48\rangle$ ), and  $\text{Ni}_2 \rightarrow \text{Ni}_1$  ( $|41\rangle \rightarrow |49\rangle$ ). The time-dependent population of the initial (dashed black line), final or target (solid red line), and intermediate (solid lines in different colors) states.



FIG. 3. Spin-transfer processes on  $\text{Ni}_2@C_{36}H_{36}$ :  $\text{Ni1} \rightarrow \text{Ni2}$  ( $|2\rangle \rightarrow |10\rangle$ ),  $\text{Ni1} \rightarrow \text{Ni2}$  ( $|2\rangle \rightarrow |30\rangle$ ),  $\text{Ni1} \rightarrow \text{Ni2}$  ( $|4\rangle \rightarrow |8\rangle$ ),  $\text{Ni2} \rightarrow \text{Ni1}$  ( $|6\rangle \rightarrow |25\rangle$ ),  $\text{Ni2} \rightarrow \text{Ni2}$  ( $|32\rangle \rightarrow |27\rangle$ ), and  $\text{Ni2} \rightarrow \text{Ni1}$  ( $|65\rangle \rightarrow |68\rangle$ ). The time-dependent population of the initial (dashed black line), final or target (solid red line), and intermediate (solid lines in different colors) states.

TABLE III. Spin localized, possible scenarios and the parameters of the laser pulses are optimized with our own genetic algorithm program and EOM-CCSD method:  $\Delta E$  is the energy difference between the initial and last (target) states, the angles of incidence in spherical coordinates  $\theta$  ( $^\circ$ ), and  $\phi$  ( $^\circ$ ), the angle between the polarization of light and the optical plane  $\gamma$  ( $^\circ$ ), the full width at half-maximum of the laser pulse (FWHM), the laser energy  $E_{\text{laser}}$ , the amplitude of the laser pulse, and the chirp, which indicates the linear sweep of the frequency with respect to the peak frequency. The ranges of  $\theta$  ( $^\circ$ ) and  $\phi$  ( $^\circ$ ) are from  $[0^\circ, 180^\circ]$  and  $[0^\circ, 360^\circ]$ , respectively. Also, the range of  $\gamma$  is from  $[0^\circ, 360^\circ]$  for both structures  $\text{Ni}_2@C_{32}H_{32}$  and  $\text{Ni}_2@C_{32}H_{36}$ .

| System                     | Method   | Scenario      | Spin localized        | Process                                                   | Fidelity (%) <sup>a</sup> | $\Delta E$ (eV) | $\theta$ ( $^\circ$ ) | $\phi$ ( $^\circ$ ) | $\gamma$ ( $^\circ$ ) | FWHM (fs) | $E_{\text{laser}}$ (eV) | chirp  |
|----------------------------|----------|---------------|-----------------------|-----------------------------------------------------------|---------------------------|-----------------|-----------------------|---------------------|-----------------------|-----------|-------------------------|--------|
| $\text{Ni}_2@C_{32}H_{32}$ | EOM-CCSD | spin-transfer | Ni2 $\rightarrow$ Ni1 | $ 3 \uparrow\rangle \rightarrow  7 \uparrow\rangle$       | 99.97                     | 0.1960          | 283.94                | 120.80              | 221.48                | 317.37    | 3.164                   | 0.985  |
|                            |          | spin-transfer | Ni1 $\rightarrow$ Ni2 | $ 7 \uparrow\rangle \rightarrow  31 \uparrow\rangle$      | 97.45                     | 1.4986          | 288.76                | 15.99               | 326.95                | 489.64    | 1.545                   | 0.991  |
|                            |          | spin-transfer | Ni1 $\rightarrow$ Ni2 | $ 37 \downarrow\rangle \rightarrow  46 \downarrow\rangle$ | 96.377                    | 0.1559          | 268.064               | 290.73              | 275.68                | 282.20    | 2.782                   | 1.023  |
|                            |          | spin-transfer | Ni1 $\rightarrow$ Ni2 | $ 39 \uparrow\rangle \rightarrow  43 \uparrow\rangle$     | 99.92                     | 0.11824         | 90.12                 | 135.09              | 133.62                | 382.70    | 2.098                   | 1.010  |
|                            |          | spin-transfer | Ni1 $\rightarrow$ Ni2 | $ 39 \uparrow\rangle \rightarrow  48 \uparrow\rangle$     | 99.16                     | 0.1559          | 276.39                | 340.64              | 263.21                | 376.53    | 3.039                   | 1.029  |
|                            |          | spin-transfer | Ni2 $\rightarrow$ Ni1 | $ 41 \downarrow\rangle \rightarrow  49 \downarrow\rangle$ | 99.92                     | 0.04595         | 251.16                | 305.79              | 306.79                | 320.43    | 2.471                   | 1.028  |
| $\text{Ni}_2@C_{36}H_{36}$ | EOM-CCSD | spin-transfer | Ni2 $\rightarrow$ Ni1 | $ 2 \downarrow\rangle \rightarrow  10 \downarrow\rangle$  | 76.22                     | 1.2735          | 96.14                 | 245.30              | 353.31                | 402.24    | 2.303                   | 1.049  |
|                            |          | spin-transfer | Ni1 $\rightarrow$ Ni2 | $ 2 \downarrow\rangle \rightarrow  30 \downarrow\rangle$  | 90.78                     | 1.49745         | 84.51                 | 296.98              | 50.57                 | 370.68    | 1.668                   | 1.041  |
|                            |          | spin-transfer | Ni1 $\rightarrow$ Ni2 | $ 4 \uparrow\rangle \rightarrow  8 \uparrow\rangle$       | 100                       | 0.05682         | 264.62                | 253.28              | 3.22                  | 481.43    | 2.752                   | 0.978  |
|                            |          | spin-transfer | Ni2 $\rightarrow$ Ni1 | $ 6 \downarrow\rangle \rightarrow  25 \downarrow\rangle$  | 99.15                     | 1.33422         | 302.33                | 243.18              | 186.58                | 287.78    | 1.375                   | 1.023  |
|                            |          | spin-transfer | Ni2 $\rightarrow$ Ni1 | $ 32 \uparrow\rangle \rightarrow  27 \uparrow\rangle$     | 96.26                     | 0.10642         | 271.88                | 2.985               | 29.87                 | 406.74    | 1.471                   | 0.9728 |
|                            |          | spin-transfer | Ni2 $\rightarrow$ Ni1 | $ 65 \downarrow\rangle \rightarrow  68 \downarrow\rangle$ | 99.97                     | 0.12278         | 162.11                | 326.60              | 312.63                | 241.97    | 0.133                   | 0.950  |

<sup>a</sup> fidelity is defined as the population of the goal state following the influence of the laser pulse.

TABLE IV. Spin localized, reversed possible spin-transfer scenarios and the parameters of the laser pulses are optimized with our own genetic algorithm program and EOM-CCSD method for both structures  $\text{Ni}_2@C_{32}H_{32}$  and  $\text{Ni}_2@C_{32}H_{36}$ .

| System                     | Method   | Scenario      | Spin localized        | Process                                                   | Fidelity (%) | $\Delta E$ (eV) | $\theta$ ( $^\circ$ ) | $\phi$ ( $^\circ$ ) | $\gamma$ ( $^\circ$ ) | FWHM (fs) | $E_{\text{laser}}$ (eV) | chirp  |
|----------------------------|----------|---------------|-----------------------|-----------------------------------------------------------|--------------|-----------------|-----------------------|---------------------|-----------------------|-----------|-------------------------|--------|
| $\text{Ni}_2@C_{32}H_{32}$ | EOM-CCSD | spin-transfer | Ni1 $\rightarrow$ Ni2 | $ 7 \uparrow\rangle \rightarrow  3 \uparrow\rangle$       | 99.90        | 0.1960          | 88.60                 | 320.68              | 329.90                | 430.49    | 2.825                   | 1.017  |
|                            |          | spin-transfer | Ni2 $\rightarrow$ Ni1 | $ 31 \uparrow\rangle \rightarrow  7 \uparrow\rangle$      | 97.54        | 1.4986          | 89.52                 | 194.77              | 109.35                | 359.08    | 1.551                   | 1.010  |
|                            |          | spin-transfer | Ni2 $\rightarrow$ Ni1 | $ 46 \downarrow\rangle \rightarrow  37 \downarrow\rangle$ | 95.94        | 0.1559          | 259.31                | 5.13                | 27.30                 | 451.80    | 2.177                   | 0.9502 |
|                            |          | spin-transfer | Ni2 $\rightarrow$ Ni1 | $ 43 \uparrow\rangle \rightarrow  39 \uparrow\rangle$     | 100          | 0.11824         | 84.31                 | 295.82              | 32.71                 | 493.59    | 1.815                   | 0.995  |
|                            |          | spin-transfer | Ni2 $\rightarrow$ Ni1 | $ 48 \uparrow\rangle \rightarrow  39 \uparrow\rangle$     | 98.98        | 0.1559          | 113.88                | 78.76               | 303.19                | 451.80    | 2.176                   | 0.971  |
|                            |          | spin-transfer | Ni1 $\rightarrow$ Ni2 | $ 49 \downarrow\rangle \rightarrow  41 \downarrow\rangle$ | 78.43        | 0.04595         | 55.35                 | 33.40               | 125.81                | 294.67    | 0.752                   | 0.990  |
| $\text{Ni}_2@C_{36}H_{36}$ | EOM-CCSD | spin-transfer | Ni2 $\rightarrow$ Ni1 | $ 6 \downarrow\rangle \rightarrow  2 \downarrow\rangle$   | 100          | 0.05681         | 105.71                | 315.66              | 186.87                | 338.02    | 2.634                   | 1.010  |
|                            |          | spin-transfer | Ni2 $\rightarrow$ Ni1 | $ 8 \uparrow\rangle \rightarrow  4 \uparrow\rangle$       | 100          | 0.05682         | 93.95                 | 145.09              | 181.08                | 402.66    | 2.689                   | 1.013  |
|                            |          | spin-transfer | Ni1 $\rightarrow$ Ni2 | $ 27 \uparrow\rangle \rightarrow  32 \uparrow\rangle$     | 84.12        | 0.10642         | 231.17                | 288.90              | 1.35                  | 382.16    | 1.724                   | 1.020  |
|                            |          | spin-transfer | Ni2 $\rightarrow$ Ni1 | $ 30 \downarrow\rangle \rightarrow  2 \downarrow\rangle$  | 94.55        | 1.49745         | 114.76                | 21.48               | 17.64                 | 484.72    | 1.359                   | 0.9715 |
|                            |          | spin-transfer | Ni1 $\rightarrow$ Ni2 | $ 25 \downarrow\rangle \rightarrow  6 \downarrow\rangle$  | 99.93        | 1.33422         | 96.10                 | 218.30              | 16.93                 | 493.89    | 1.398                   | 0.966  |
|                            |          | spin-transfer | Ni1 $\rightarrow$ Ni2 | $ 68 \downarrow\rangle \rightarrow  65 \downarrow\rangle$ | 99.75        | 0.12278         | 198.70                | 235.93              | 301.14                | 19.06     | 0.293                   | 1.020  |



FIG. 4. The reserved spin-transfer processes with the same laser pulses on  $\text{Ni}_2@C_{32}H_{32}$ :  $\text{Ni1} \rightarrow \text{Ni2}$  ( $|7\rangle \rightarrow |3\rangle$ ),  $\text{Ni2} \rightarrow \text{Ni1}$  ( $|31\rangle \rightarrow |7\rangle$ ),  $\text{Ni2} \rightarrow \text{Ni1}$  ( $|43\rangle \rightarrow |39\rangle$ ),  $\text{Ni2} \rightarrow \text{Ni1}$  ( $|46\rangle \rightarrow |39\rangle$ ),  $\text{Ni2} \rightarrow \text{Ni1}$  ( $|48\rangle \rightarrow |39\rangle$ ), and  $\text{Ni1} \rightarrow \text{Ni2}$  ( $|49\rangle \rightarrow |41\rangle$ ). The time-dependent population of the initial (dashed black line), final or target (solid red line), and intermediate (solid lines in different colors) states.



FIG. 5. The reserved spin-transfer processes with the same laser pulses on  $\text{Ni}_2@C_{36}H_{36}$ :  $\text{Ni}_2 \rightarrow \text{Ni}_1$  ( $|6\rangle \rightarrow |2\rangle$ ),  $\text{Ni}_2 \rightarrow \text{Ni}_1$  ( $|8\rangle \rightarrow |4\rangle$ ),  $\text{Ni}_1 \rightarrow \text{Ni}_2$  ( $|25\rangle \rightarrow |6\rangle$ ),  $\text{Ni}_1 \rightarrow \text{Ni}_2$  ( $|27\rangle \rightarrow |32\rangle$ ),  $\text{Ni}_2 \rightarrow \text{Ni}_1$  ( $|30\rangle \rightarrow |2\rangle$ ), and  $\text{Ni}_1 \rightarrow \text{Ni}_2$  ( $|68\rangle \rightarrow |65\rangle$ ). The time-dependent population of the initial (dashed black line), final or target (solid red line), and intermediate (solid lines in different colors) states.
